# Supplementary material
Source: PubMed Central journal article supplement (PMC4426220)
Supplement: NIHMS665911-supplement-supplement_1.pdf [file NIHMS665911-supplement-supplement_1.pdf]

**Supplemental Table.** Clinical characteristics of the dry eye study population and galectin-3 levels.

| Patient No | Sex | Age | Eye | ATD | MGD | GVHD | SS | Gal-3 in tears (ng/ $\mu$ l) | Gal-3C/Gal-3 Ratio |
|------------|-----|-----|-----|-----|-----|------|----|------------------------------|--------------------|
| 1          | F   | 50  | OD  | +   | -   | -    | -  | 0.27                         | 0.00               |
| 2          | F   | 53  | OD  | +   | -   | -    | -  | 0.55                         | 0.00               |
| 3          | F   | 58  | OD  | +   | -   | -    | -  | 0.04                         | 0.00               |
| 4          | M   | 50  | OD  | +   | -   | -    | -  | 1.33                         | 0.29               |
| 5          | F   | 54  | OD  | +   | -   | -    | -  | 0.41                         | 0.39               |
| 6          | F   | 62  | OD  | +   | -   | -    | -  | 0.09                         | 0.00               |
| 7          | F   | 56  | OD  | +   | -   | -    | -  | 0.17                         | 0.00               |
| 8          | F   | 59  | OD  | +   | -   | -    | -  | 0.30                         | 0.36               |
| 9          | M   | 52  | OD  | +   | -   | -    | -  | 0.38                         | 0.00               |
| 10         | M   | 47  | OD  | +   | -   | -    | -  | 0.14                         | 0.00               |
| 11         | F   | 63  | OD  | +   | -   | -    | -  | 0.08                         | 0.00               |
| 12         | F   | 57  | OD  | +   | -   | -    | -  | 1.36                         | 0.23               |
| 13         | M   | 57  | OD  | +   | +   | +    | -  | 0.13                         | 0.18               |
|            |     |     | OS  | +   | +   | +    | -  | 0.19                         | 0.52               |
| 14         | M   | 35  | OD  | +   | +   | +    | -  | 0.35                         | 0.39               |
|            |     |     | OS  | +   | +   | +    | -  | 0.32                         | 0.42               |
| 15         | F   | 84  | OD  | +   | +   | -    | +  | 0.71                         | 0.34               |
|            |     |     | OS  | +   | +   | -    | +  | 0.35                         | 0.00               |
| 16         | M   | 74  | OD  | -   | +   | -    | -  | 0.09                         | 0.00               |
|            |     |     | OS  | -   | +   | -    | -  | 0.32                         | 0.02               |

ATD = aqueous tear deficiency; DE = dry eye; Gal-3 = galectin-3; Gal-3C = galectin-3C; GVHD = graft versus host disease; MGD = meibomian gland dysfunction; SS = Sjögren syndrome
